# Supplementary material
Source: PubMed Central journal article supplement (PMC2812067)

**Supplemental Figure Legends.**

**Figure S1. MDA-7/IL-24 activates PERK, JNK and p38 MAPK and inactivates ERK1/2 in SKOVIII cells.** SKOVIII cells were plated and 24 h after plating infected with Ad.5-*cmv* or Ad.5-*mda-7* (50 m.o.i.). Forty eight h after infection, cells were isolated, and processed for SDS PAGE and blotting to determine the expression and the phosphorylation of the indicated proteins (n = 2).

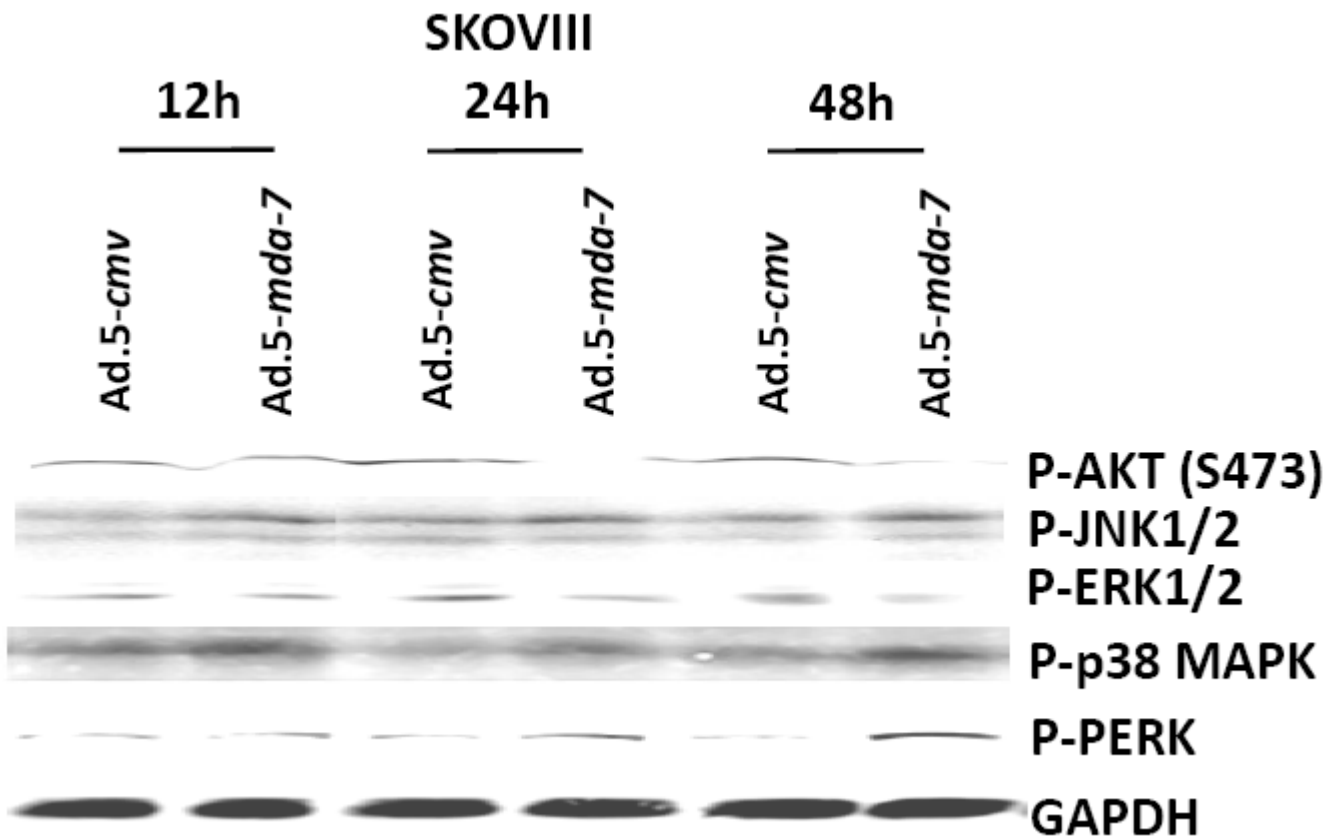

**Figure S2. GST-MDA-7 enhances BBR3464 lethality in primary human GBM cells.** Primary human glioma cells (GBM6) were plated and 24 h after plating were treated with GST or GST-MDA-7 (20, 40 nM). Cells were treated 30 min later with vehicle or with BBR3464 (100, 200 nM). Cells were incubated for 96 h after which time cell viability was assessed in triplicate by trypan blue assay ( $\pm$  SEM, n = 3).

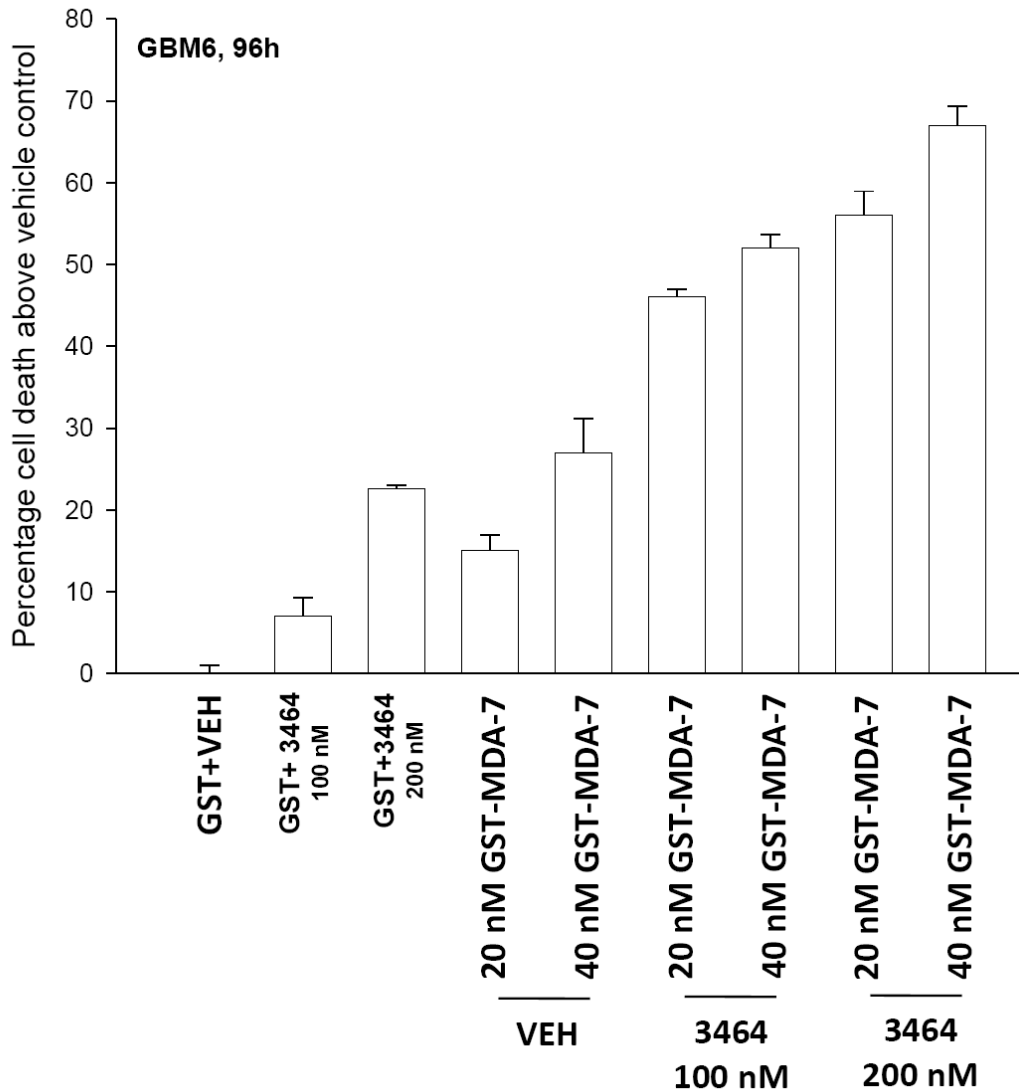

**Figure S3. GST-MDA-7 enhances cisplatin lethality in primary human GBM cells.** Primary human glioma cells (GBM6) were plated and 24 h after plating were treated with GST or GST-MDA-7 (10, 15, 20 nM). Cells were treated 30 min later with vehicle or with cisplatin (500, 750, 1000 nM). Cells were incubated for 96 h after which time cell viability was assessed in triplicate by trypan blue assay ( $\pm$  SEM, n = 3).

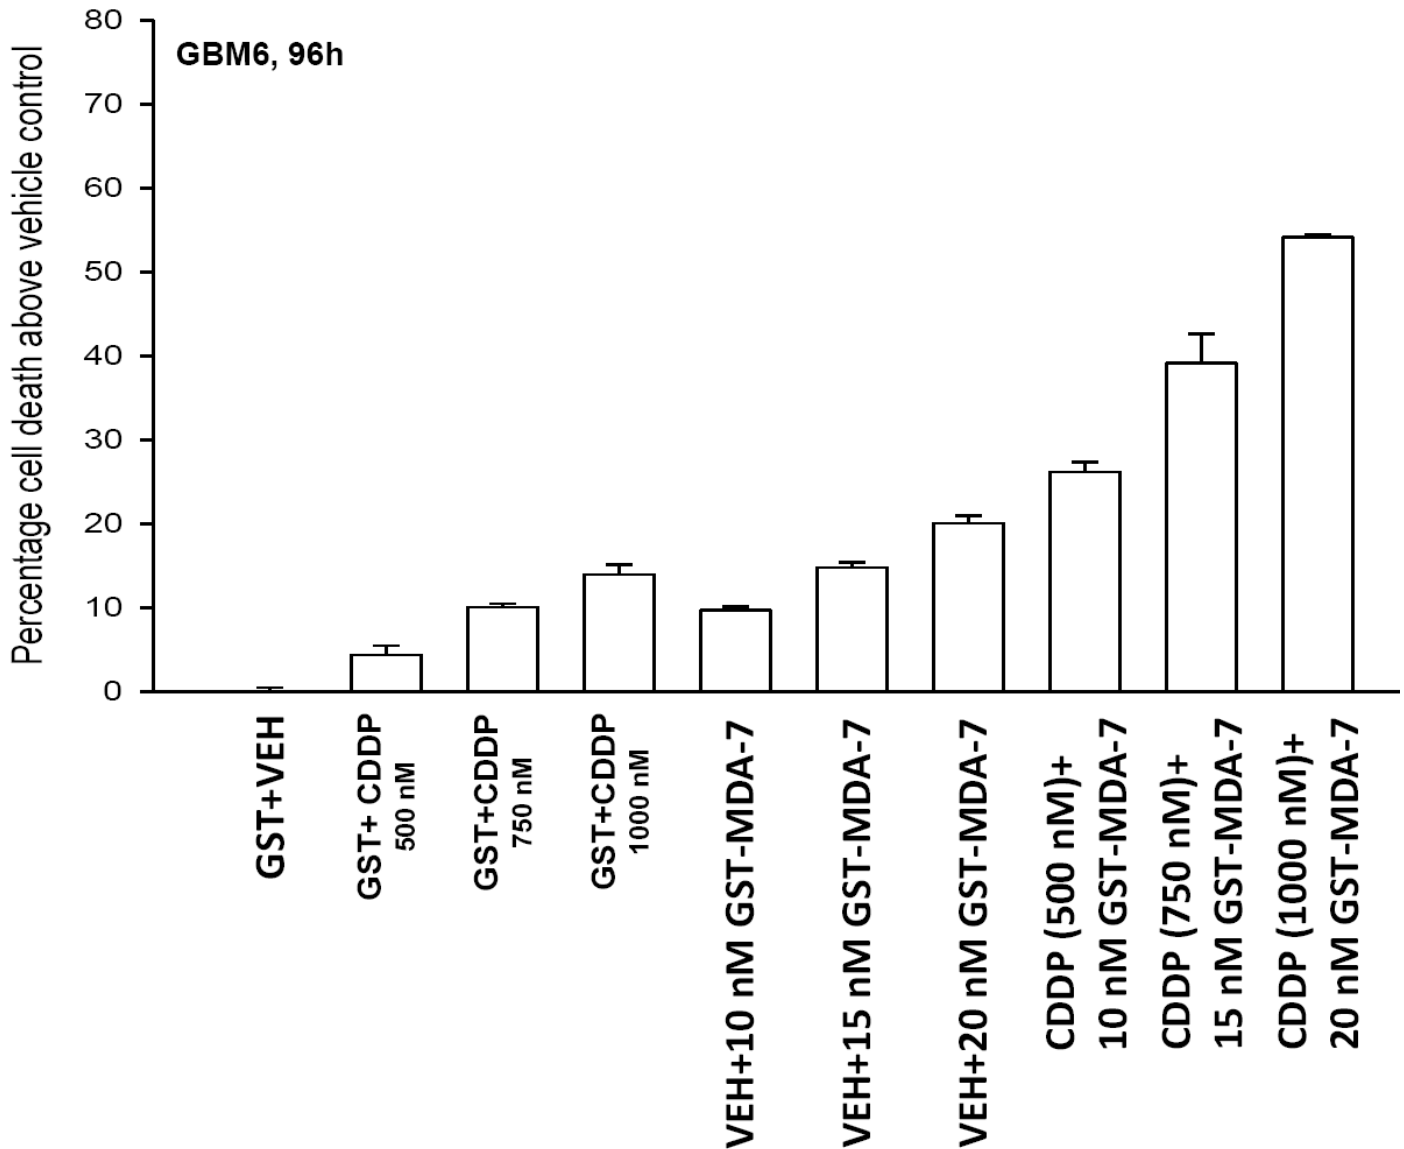

**Figure S4. Ad.5-*mda-7* and cisplatin interact to kill primary human ovarian cancer cells in vitro.**

Primary human OCCs were obtained from patient ascites. Cells were passaged once and plated for analyses. Cells 24 h after plating infected with Ad.5-*cmv* or Ad.5-*mda-7* (50 m.o.i.), and 12 h after infection cells were treated with vehicle (DMSO) or with cisplatin (CDDP, 3  $\mu$ M). Seventy two h and 96 h after virus infection cell viability was determined by trypan blue exclusion assay on isolated cells ( $\pm$  SEM, n = 3).

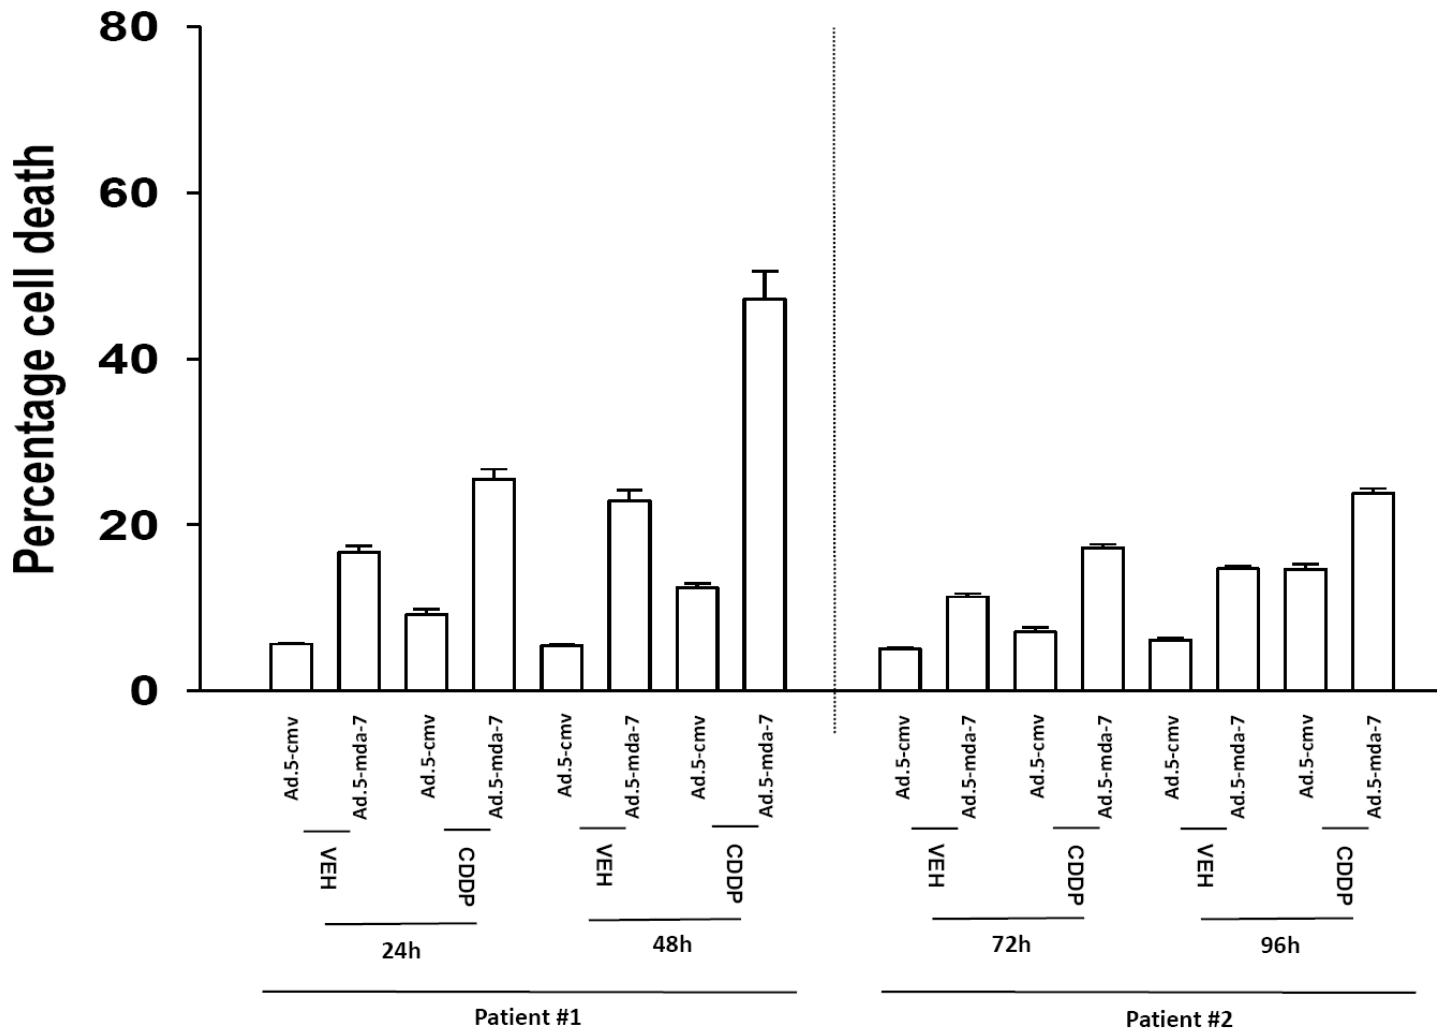

**Figure S5. Knock down of ATG5 suppresses Ad.5-*mda-7*-induced cell killing in OCCs.** OVCAR cells 24 h after plating infected with Ad.5-*cmv* or Ad.5-*mda-7* (50 m.o.i.), and 12 h after infection transfected with either a vector control plasmid to express a non-specific scrambled siRNA (siSCR) or with a plasmid to knockdown expression of ATG5 (siATG5). Twenty four h after virus infection cells were treated with vehicle (DMSO) or with cisplatin (CDDP, 3  $\mu$ M). Seventy two h after virus infection cell viability was determined by trypan blue exclusion assay on isolated cells ( $\pm$  SEM, n = 3).

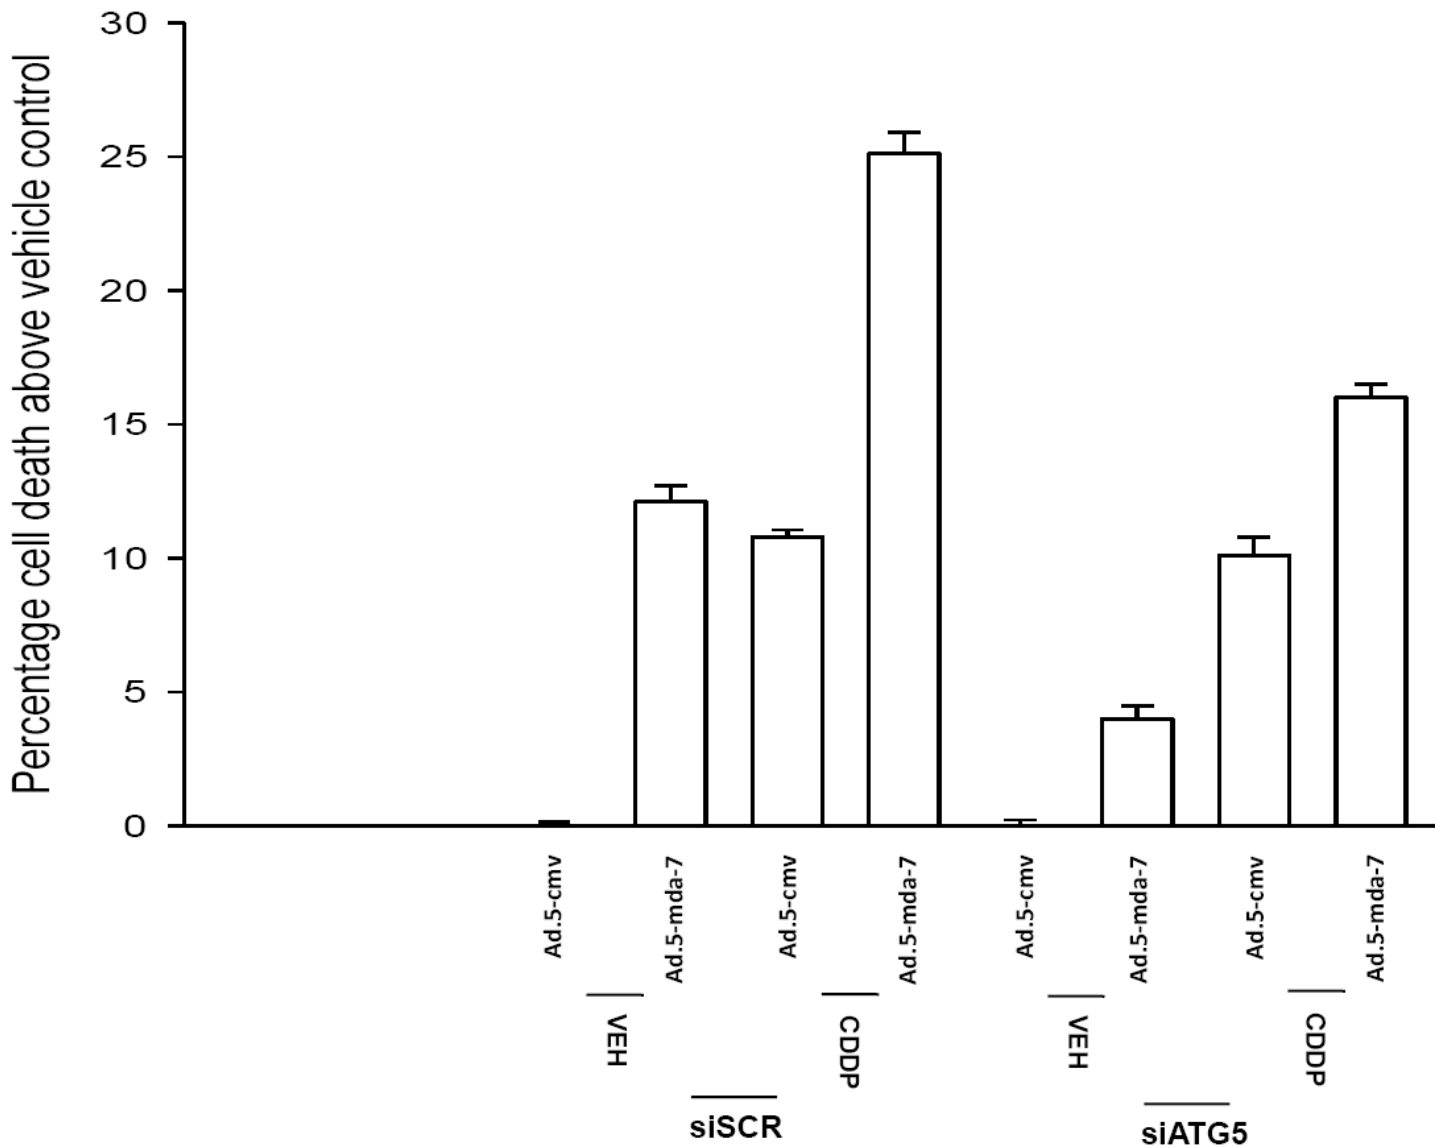

**Figure S6. Ad.5-*mda-7* and [cisplatin + paclitaxel] treatment interact in a greater than additive fashion to kill ovarian cancer cells in colony formation assays.** OVCAR cells were plated as single cells in 60 mm dishes (250-1000 cells/dish) in sextuplicate and infected with Ad.5-*cmv* or Ad.5-*mda-7* (50 m.o.i.), and 24 h after infection as indicated cells were treated with paclitaxel (10 nM) and cisplatin (CDDP, 3  $\mu$ M), as indicated. Drug containing media was removed 48 h later and cells permitted to form colonies for the following 14 days. Data are normalized to 1.00 for virus infection + vehicle treatment for each virus condition. Ad.5-*mda-7* reduced survival to 0.83 of control ( $\pm$  SEM, n = 2). \* p < 0.05 less than corresponding value in Ad.5-*cmv* infected cells.

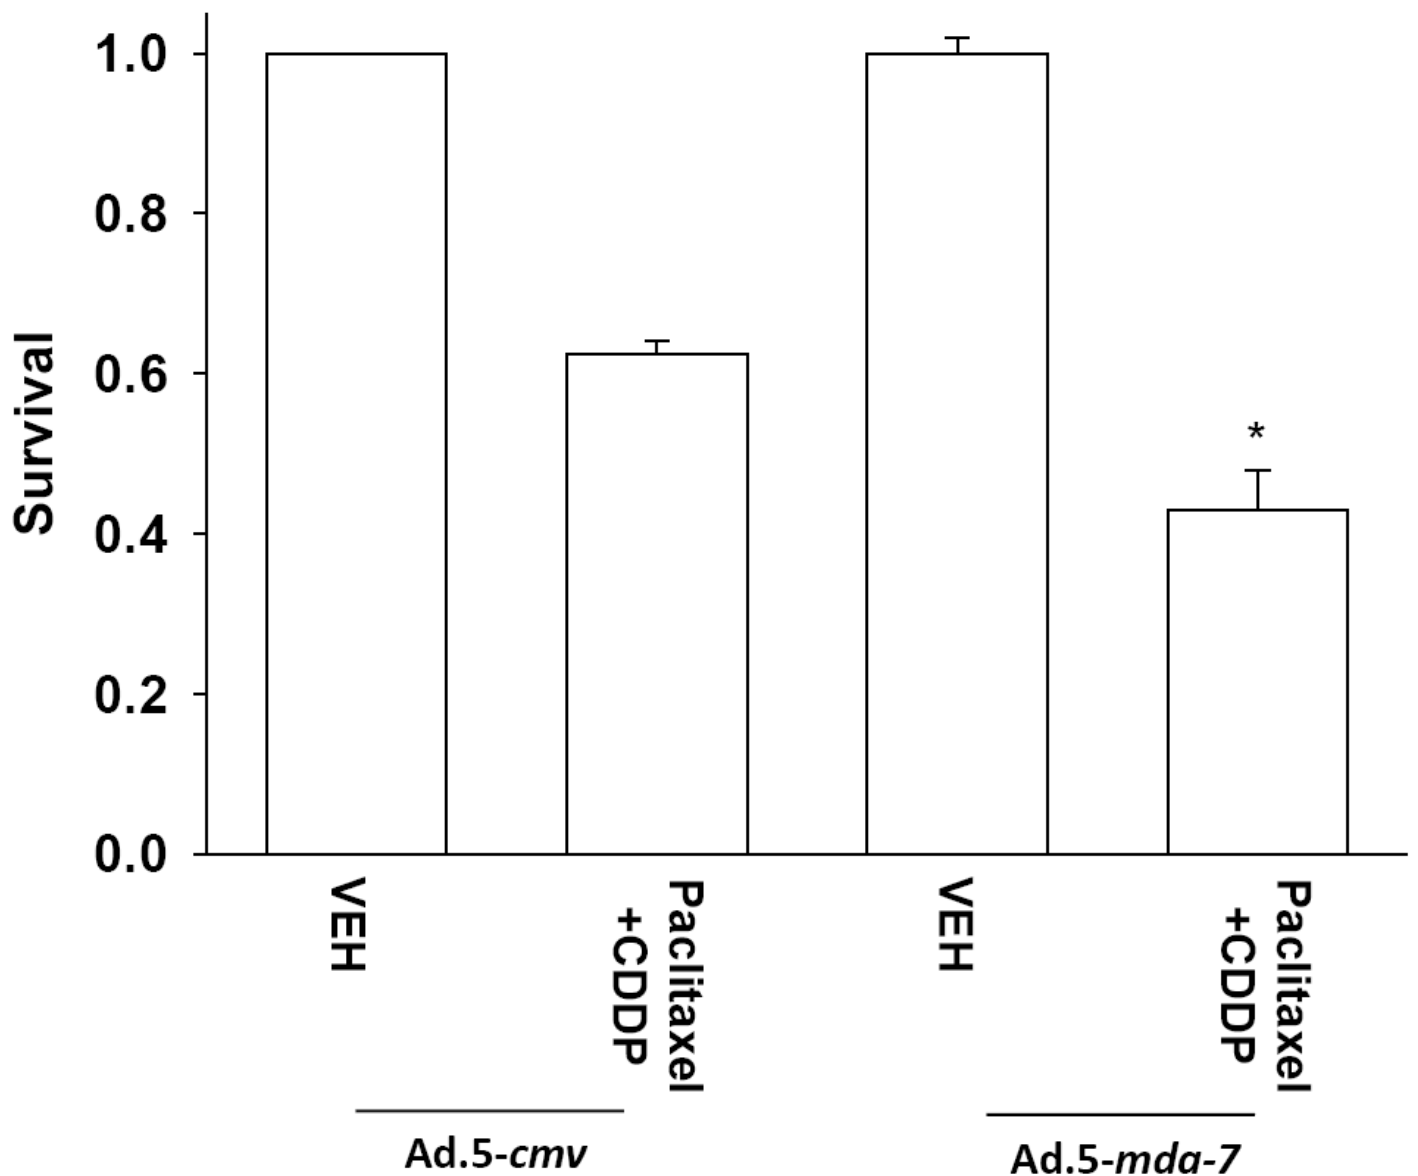

Supplement: supp_mol.109.061820_Supplemental_Figure_Legends_061820.pdf [file supp_mol.109.061820_Supplemental_Figure_Legends_061820.pdf]
